# Supplementary material for: An endogenous stimulus detonated nanocluster-bomb for contrast-enhanced cancer imaging and combination therapy
Source: Royal Society of Chemistry journal article supplement (doi:10.1039/d1sc03847h), 2021-01-01
Supplement: d1sc03847h1.pdf [file d1sc03847h1.pdf]

## Supporting information

### **An endogenous stimulus detonated nanoclusters-bomb for contrast enhanced cell imaging and combination therapy**

Huanhuan Sun, Wenjie Ma, Shuangdi Duan, Jin Huang, Ruichen Jia, Hong Cheng, Biao Chen, Xiaoxiao He\*, Kemin Wang\*

State Key Laboratory of Chemo/Biosensing and Chemometrics, College of Biology, College of Chemistry and Chemical Engineering, Hunan University, Key Laboratory for Bio-Nanotechnology and Molecule Engineering of Hunan Province, Changsha 410082, China. Email: xiaoxiaohe@hnu.edu.cn, kmwang@hnu.edu.cn.

**Table S1.** The names and properties of peptides used in this work.

| Name            | Sequence (from N' to C')                           | PI     | Net charge (pH=7.0) |
|-----------------|----------------------------------------------------|--------|---------------------|
| P <sub>T1</sub> | CCYRRRRRRRRRGD<br>(provide the positive charge)    | 12.3   | 8.9                 |
| P <sub>T2</sub> | CCYGGGGRGRK(TAMRA)RGD<br>(signal unit)             | ~ 10.5 | ~ 3.9               |
| P <sub>L1</sub> | CCYAANRRRRRRRRRGD<br>(provide the positive charge) | 12.3   | 6.9                 |
| P <sub>L2</sub> | CCYGGGGAANRK(TAMRA)RRGD<br>(signal unit)           | ~ 10.5 | ~ 3.9               |
| P <sub>3</sub>  | CCYGGGGRGRKRGD<br>(improve the S/N of NSET)        | 10.5   | 3.9                 |

**Table S2.** The comparison of S/N corresponded to AuNCs probes synthesized in different concentration of P<sub>T1</sub>, P<sub>T3</sub> (collectively named as P<sub>0</sub>) and P<sub>2</sub>.

| P <sub>0</sub> (P <sub>T1</sub> +P <sub>3</sub> ):P <sub>T2</sub> | P <sub>T1</sub> :P <sub>3</sub> :P <sub>T2</sub> | S/N  |
|-------------------------------------------------------------------|--------------------------------------------------|------|
| 0:1                                                               | 0:0:1                                            | 6.59 |
| 1:1                                                               | 0.5:0.5:1                                        | 8.7  |
| 10:1                                                              | 5:5:1                                            | 2.16 |
| 30:1                                                              | 15:15:1                                          | 7.17 |
| 60:1                                                              | 30:30:1                                          | 20   |

**Table S3.** The comparison of S/N corresponded to AuNCs probes synthesized with different concentration of NaOH at the peptide ratio of P<sub>0</sub>:P<sub>3</sub>=30:1, 60:1.

| <b>Name</b> | <b>P<sub>T1</sub>:P<sub>3</sub>:P<sub>T2</sub></b> | <b>0.5 M NaOH</b> | <b>1 M NaOH</b> |
|-------------|----------------------------------------------------|-------------------|-----------------|
|             | 30:0:1                                             | sediment          | 6.18            |
| 30:1        | 20:10:1                                            | sediment          | 6.54            |
|             | 15:15:1                                            | 7.17              | sediment        |
|             | 60:0:1                                             | sediment          | 3.71            |
| 60:1        | 40:20:1                                            | sediment          | 6.54            |
|             | 30:30:1                                            | 20                | sediment        |

**Table S4:** The names and properties of nucleic acid used in this work.

| Name    | Sequence (from 5' to 3')                                         | Length |
|---------|------------------------------------------------------------------|--------|
| Dz      | CCGCGGCCAGGCTAGCTACAACGACCTGGACGA                                | 33     |
| mDz     | CCGCGGCCAGGCTA <u>C</u> CTACAACGACCTGGACGA                       | 33     |
| Dz4     | CCGCGGCCAGGCTAGCTACAACGACCTGGACGA<br>TTTCGCTGCTGCTGCTGC          | 51     |
| mDz4    | CCGCGGCCAGGCTA <u>C</u> CTACAACGACCTGGACGA<br>TTTCGCTGCTGCTGCTGC | 51     |
| S1-Bhq1 | Bhq1-CCGCGGCCAGGCTAGCTACAACGACCTGGA<br>CGATTCGCTGCTGCTGCTGC      | 51     |
| S1      | TCGTCCAGGrArUGGCCGCGG                                            | 19     |
| S2      | TCGTCCAGGrArUGGCCGCGGT <sub>11</sub>                             | 30     |
| S3      | TCGTCCAGGATGGCCGCGGT <sub>11</sub>                               | 30     |
| S4      | GCAGCAGCAGCAGCG                                                  | 15     |
| S4-FAM  | GCAGCAGCAGCAGCGTT-FAM                                            | 17     |
| S4-Cy7  | GCAGCAGCAGCAGCGTT-Cy7                                            | 17     |
| S5      | T <sub>15</sub> GCAGCAGCAGCAGCG                                  | 30     |

<sup>a</sup> The underlined letters in mD<sub>z</sub> represent the mutant base.

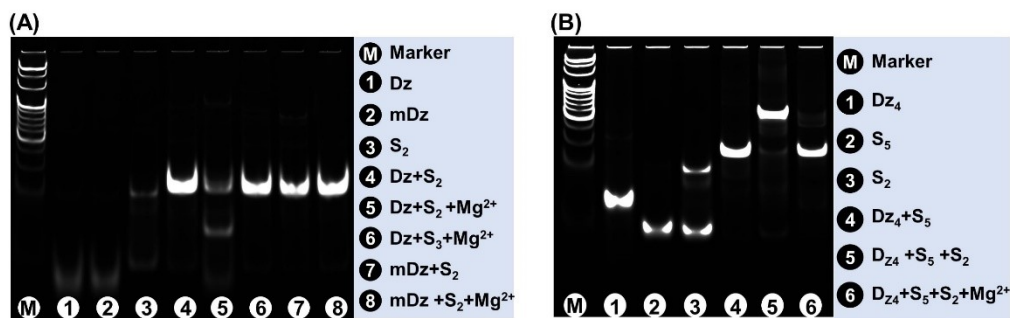

**Fig. S1.** 12% PAGE electrophoresis analysis of (A) the specific cleavage activity to EGR-1 of DNAzyme, (B) assemble and cleavage ability of functional nucleic acids.

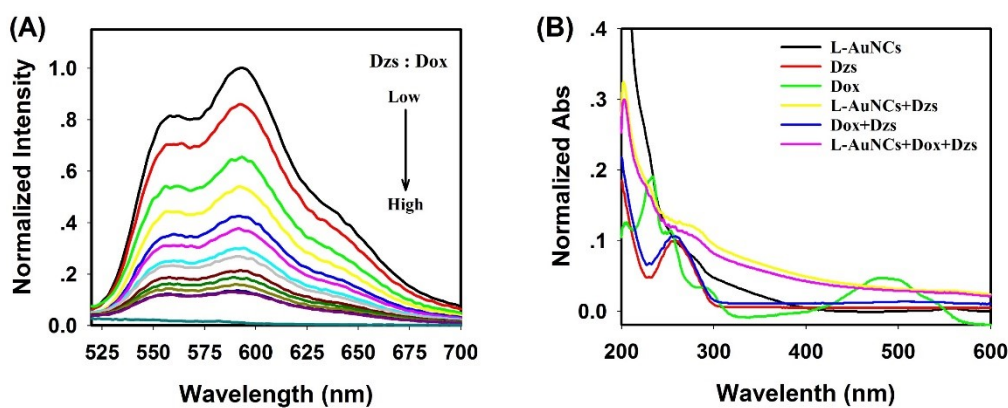

**Fig. S2.** (A) Drug loading capacity of Dzs. (B) Drug loading capacity analysis of L-AuNCs by UV-Vis absorption spectra.

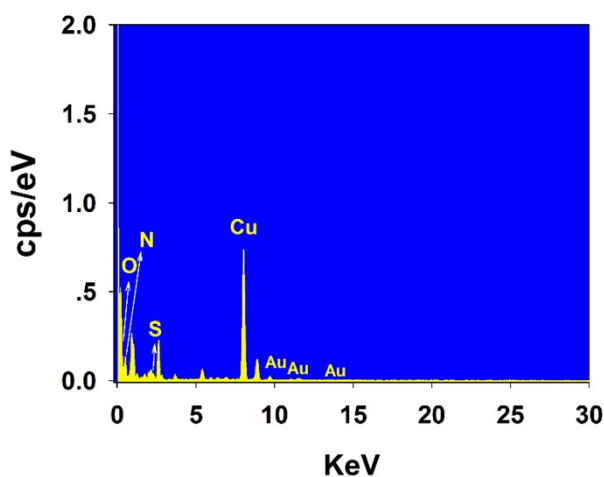

**Fig. S3.** EDS spectrum of T-AuNCs.

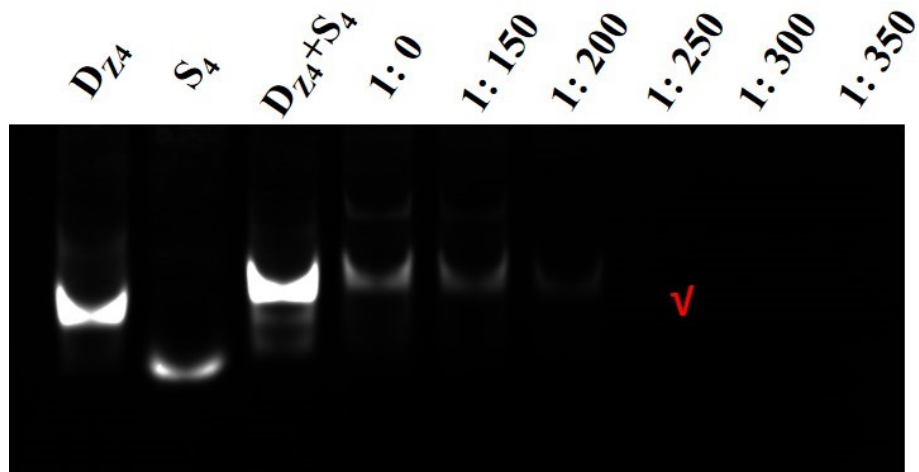

**Fig. S4.** Gel electrophoresis patterns of the T-AuNCs/Dzs nanoparticles.

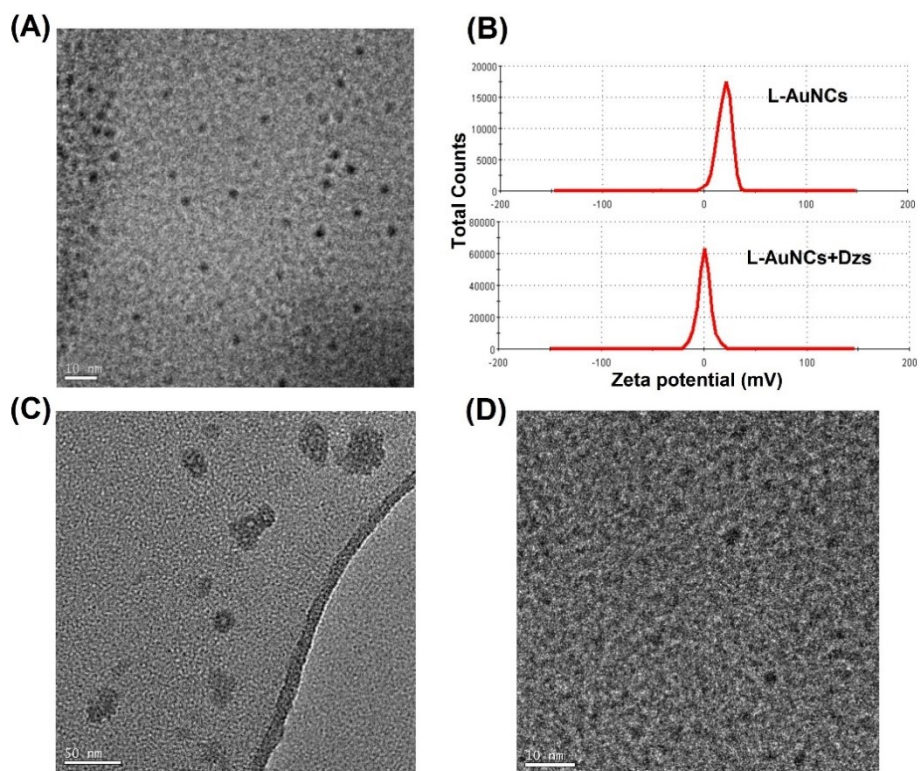

**Fig. S5.** (A) TEM image of L-AuNCs. (B) Zeta potential of L-Au NCs and L-AuNCs/Dzs nanoparticles. (C) TEM image of L-AuNCs/Dzs nanoparticles. (D) L-AuNCs/Dzs+legumain.

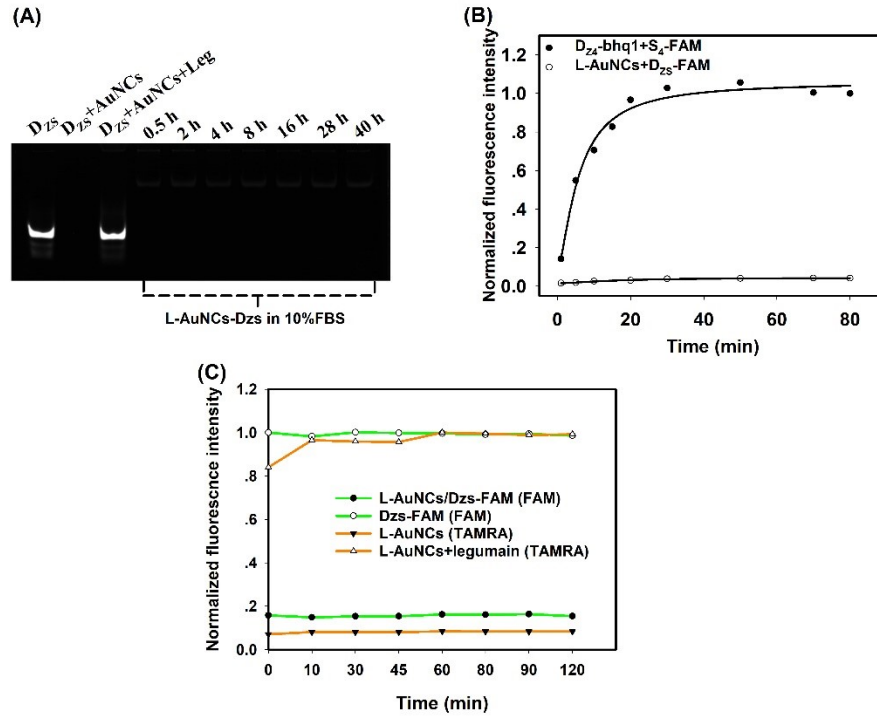

**Fig. S6.** Stability investigation of AuNCs/Dzs. (A) PAGE analysis of L-AuNCs/Dzs after incubating with 10% FBS. (B) Digestion resistant ability of L-AuNCs/Dzs to DNase I (1.5 U/mL). (C) Fluorescence analysis of the AuNCs/Dzs against 100% FBS.

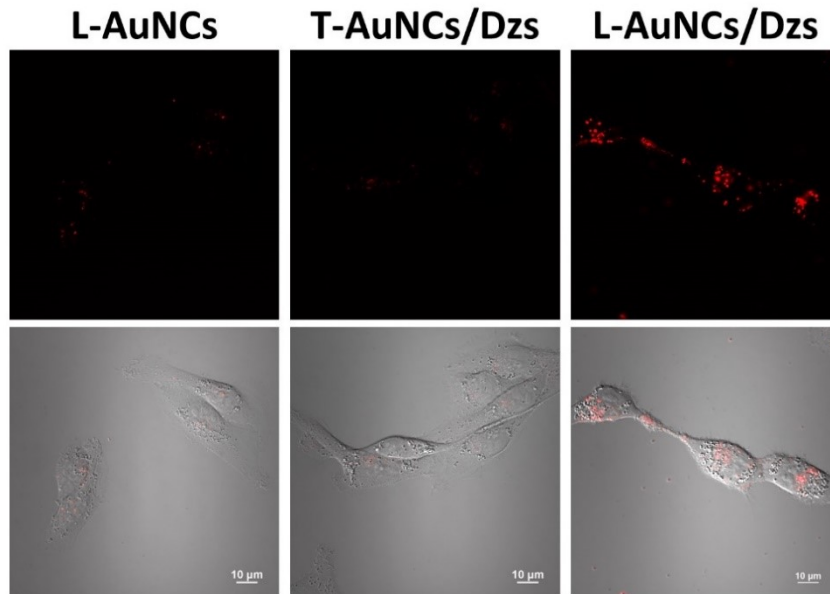

**Fig. S7.** Fluorescence imaging treated with L-AuNCs, T-AuNCs/Dzs, L-AuNCs/Dzs of MDA-MB-231 cells. Scale bar = 10 μm.

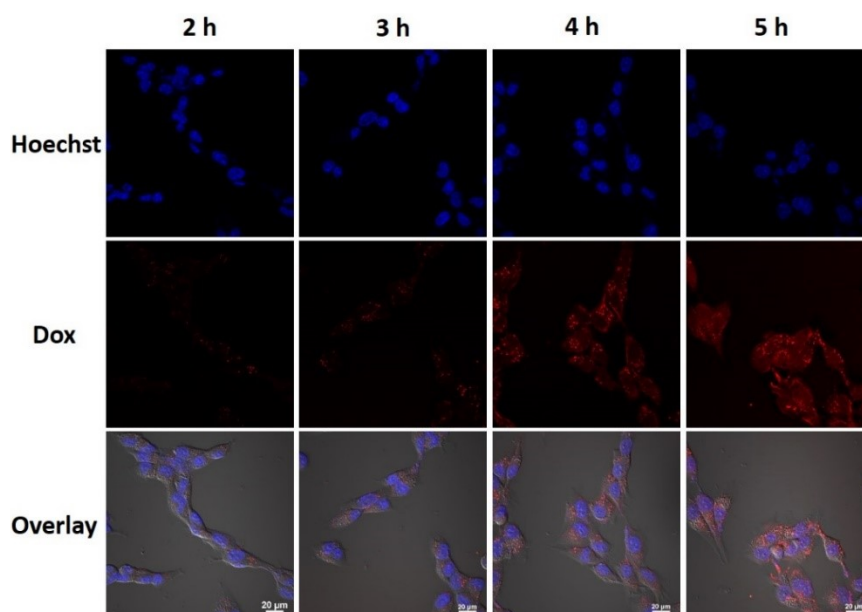

**Fig. S8.** Real-time fluorescence imaging treated with L-AuNCs/Dzs-Dox of MDA-MB-231 cells, blue and red color indicated Hoechst and Dox respectively. Scale bar = 20  $\mu\text{m}$ .

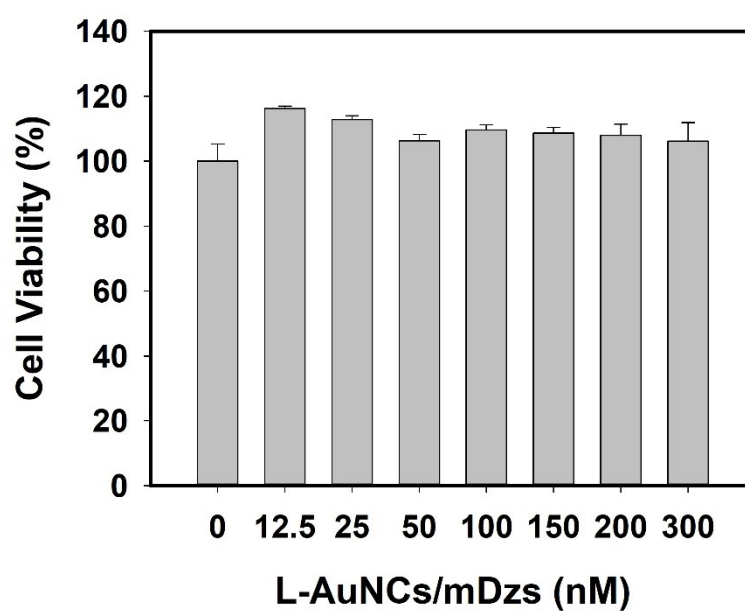

**Fig. S9.** Viability of MDA-MB-231 cells incubated for 48 h with different concentrations of L-AuNCs/mDzs (L-AuNCs: 0-90  $\mu\text{M}$ , mDzs: 0-300 nM).



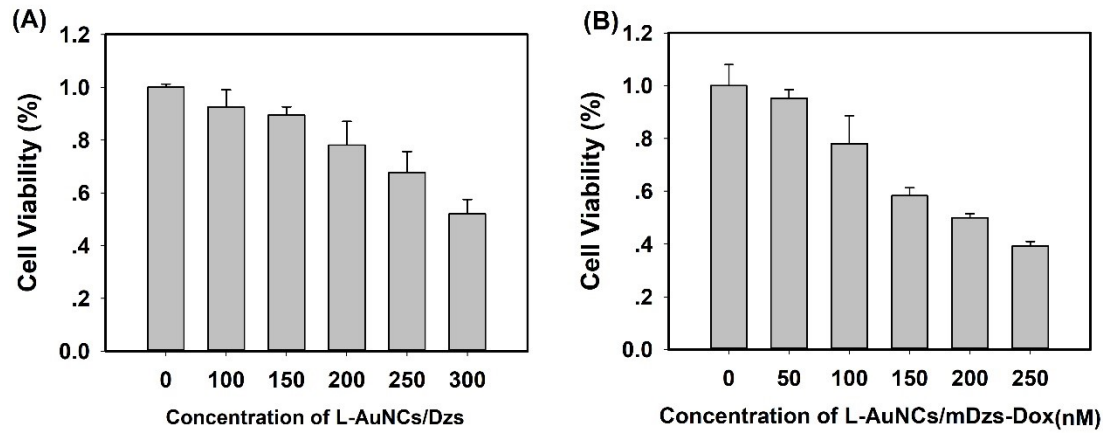

**Fig. S10.** Cytotoxicity evaluation of MDA-MB-231 cells (A) different concentrations of L-AuNCs-Dzs, (B) treated with different concentrations of L-AuNCs-mDzs-Dox.
